# Supplementary figures and images for: Differential Flavonoids and Carotenoids Profiles in Grains of Six Poaceae Crops
Source: MDPI journal article supplement (doi:10.3390/foods11142068), 2022-07-12

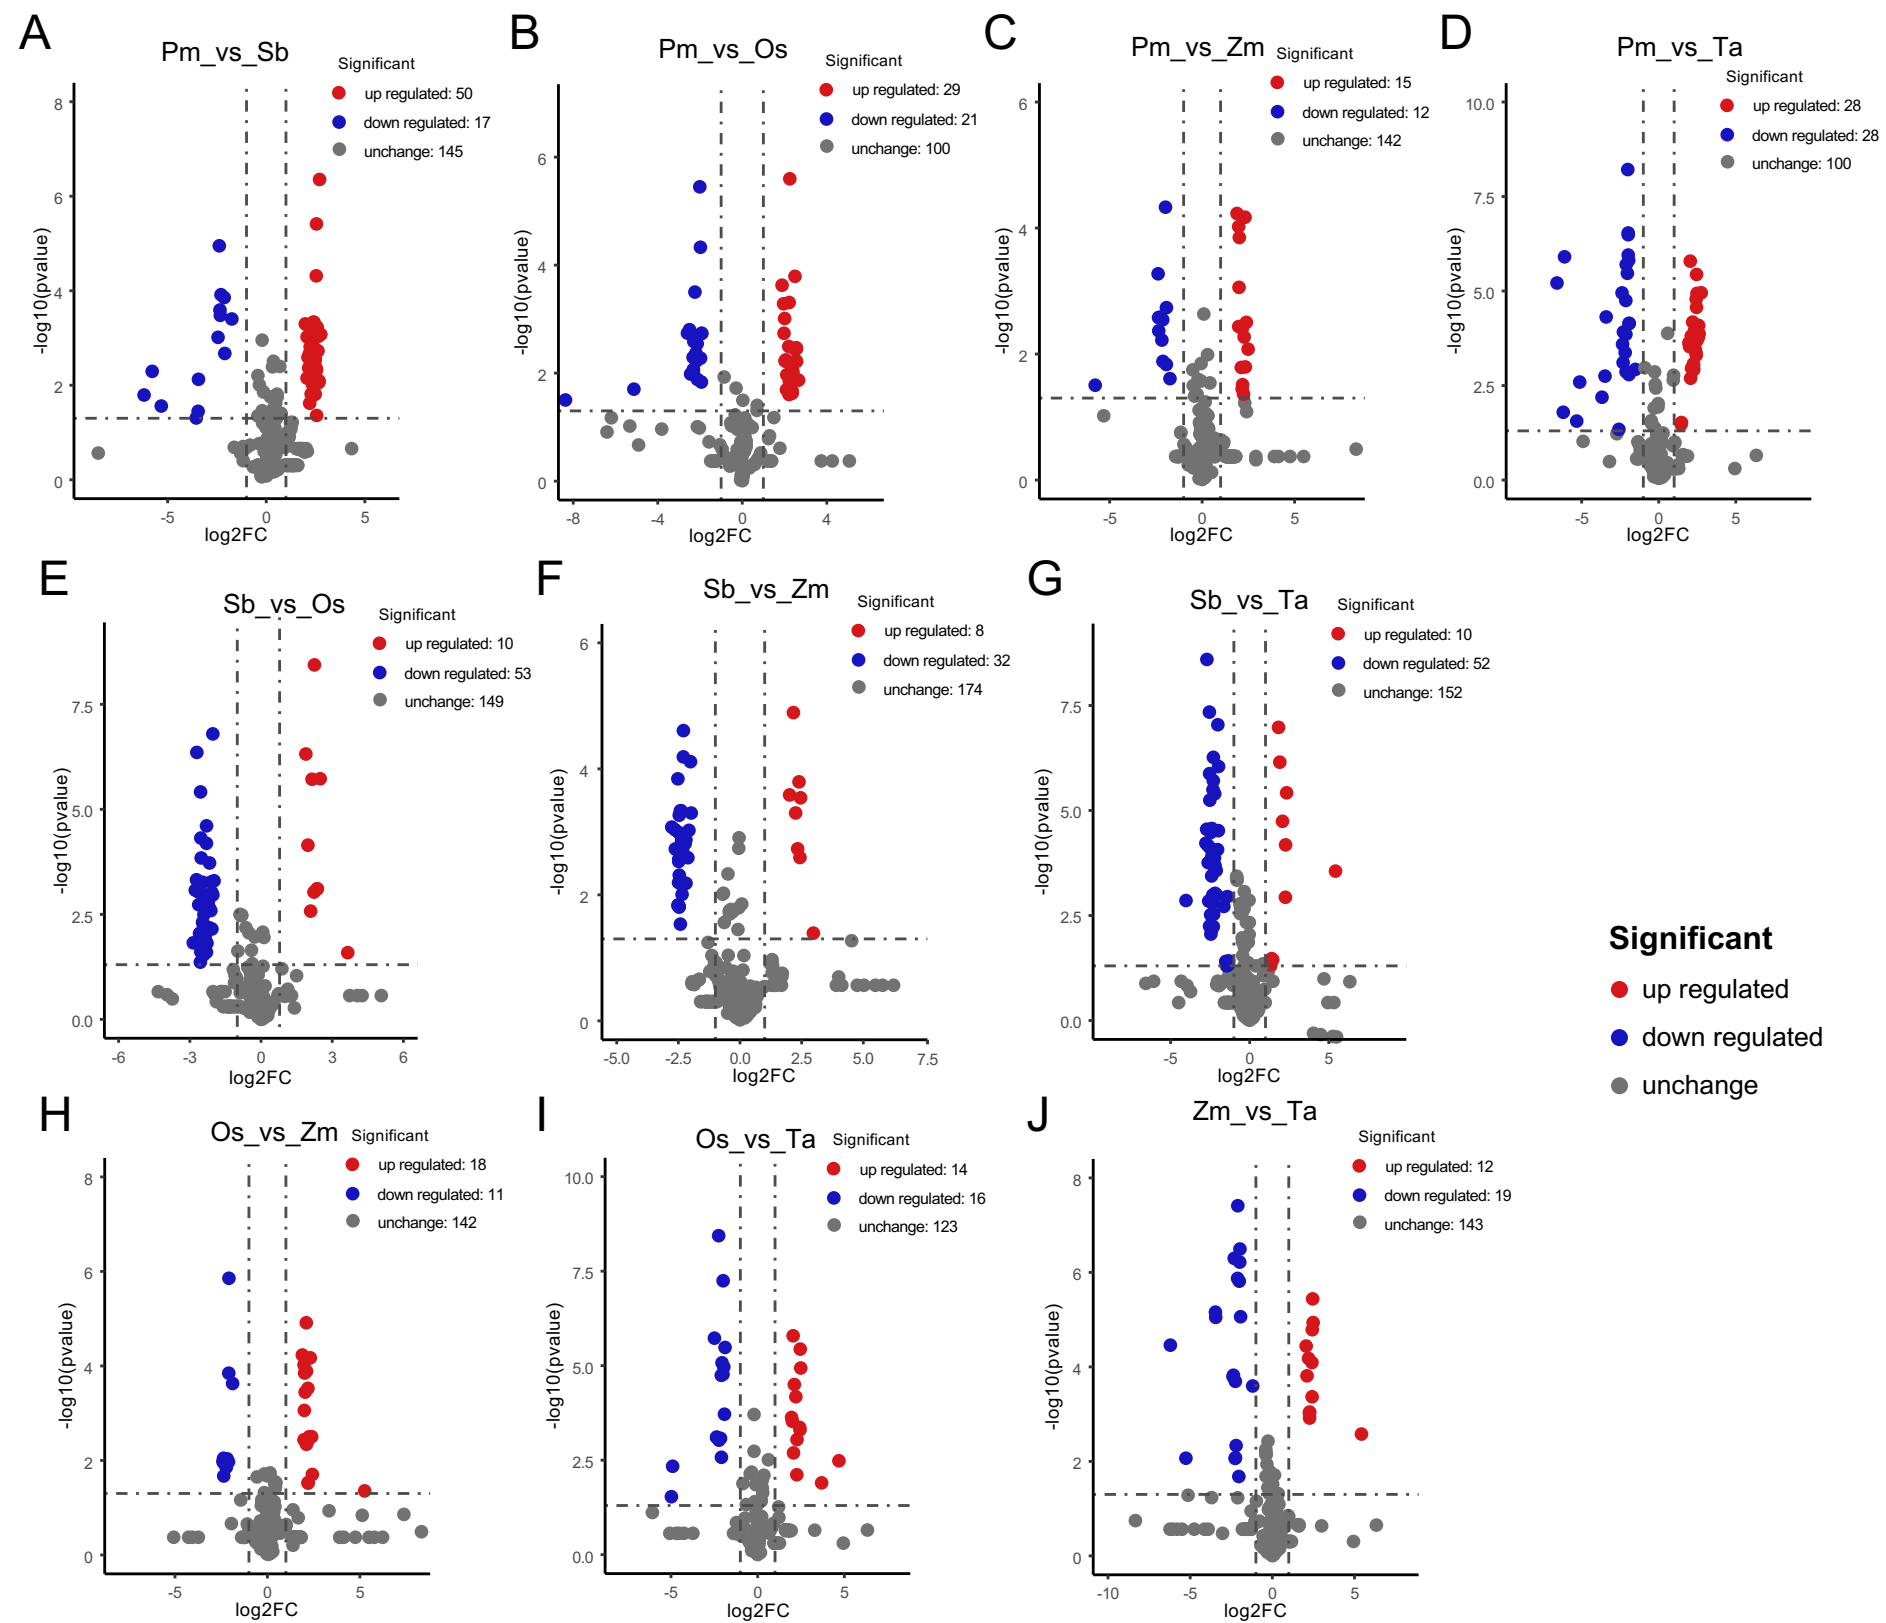

Supplement: s1 [file s1]
